# Supplementary material for: Laboratory growth capacity of an invasive cyanobacterium (Microcystis aeruginosa) on organic substrates from surface waters of permafrost peatlands
Source: Royal Society of Chemistry journal article supplement (doi:10.1039/d2em00456a), 2023-01-01
Supplement: d2em00456a1.pdf [file d2em00456a1.pdf]

1 **Supplementary**

2 *Tables*

| Type of substrates | Substrates        | Type of solutions used for the experiment | Type of reactors* | Added <i>M. Aeruginosa</i> (g <sub>wet</sub> /L) | Number of replicates | Time of experiment |
|--------------------|-------------------|-------------------------------------------|-------------------|--------------------------------------------------|----------------------|--------------------|
| vegetation         | lichen            | leachate                                  | ER                | 1                                                | 2                    | 16                 |
|                    |                   |                                           | CR                | none                                             | 1                    |                    |
|                    | moss              | leachate                                  | ER                | 1                                                | 2                    | 14                 |
|                    |                   |                                           | CR                | none                                             | 1                    |                    |
| peat               | active layer peat | leachate                                  | ER                | 1                                                | 2                    | 29                 |
|                    |                   |                                           | CR                | none                                             | 1                    |                    |
|                    | permafrost peat   | leachate                                  | ER                | 1                                                | 2                    | 16                 |
|                    |                   |                                           | CR                | none                                             | 1                    |                    |
| lake water         |                   |                                           | ER                | 1                                                | 2                    | 13                 |
|                    |                   |                                           | CR                | none                                             | 1                    |                    |

3 **Tab. S 1:** General information on the experiment. All those reactors were submitted to the same  
4 incubation's conditions, i.e. continuous light exposure, aeration through a porous stopper, a  
5 constant temperature of 25 °C and continuous stirring by a magnetic bar. \* ER = Experimental  
6 Reactor; CR = Control Reactor.

7

| Substrate       |                     | moss      | lichen | active layer peat | permafrost peat | lake water |
|-----------------|---------------------|-----------|--------|-------------------|-----------------|------------|
| <i>p</i> _value | pH                  | 0.1097    | 0.2658 | 0.0006981**       | 0.07038*        | 0.01883**  |
| (from           | SUVA <sub>254</sub> | 0.01565** | 0.3924 | 0.03103**         | 0.002041**      | 0.9499     |
| student test)   | DOC                 | 0.4009    | 0.2352 | 0.03318**         | 0.003663**      | 0.07593*   |

8 **Table S 2:** *p*\_value of student test run between values of pH, SUVA<sub>254</sub> and DOC of experimental  
9 and control reactors for each organic substrate. \*The difference is significant with a confidence  
10 interval of 90%. \*\*The difference is significant with a confidence interval of 95%.

## Z8 broth solution fabrication:

| Step1: Stock solution Z8I                            |                  | Step2: Stock solution Z8I                                    |                  |
|------------------------------------------------------|------------------|--------------------------------------------------------------|------------------|
| Stock solution Z8I                                   | Mass (g) for 1L* | Stock solution Z8I                                           | Mass (g) for 1L* |
| NaNO <sub>3</sub>                                    | 46.70            | K <sub>2</sub> HPO <sub>4</sub>                              | 3.10             |
| Ca(NO <sub>3</sub> ) <sub>2</sub> ·4H <sub>2</sub> O | 5.90             | <b>Or</b> K <sub>2</sub> HPO <sub>4</sub> ·3H <sub>2</sub> O | 4.10             |
| <b>Or</b> Ca(NO <sub>3</sub> ) <sub>2</sub>          | 4.10             | Na <sub>2</sub> CO <sub>3</sub>                              | 2.10             |
| MgSO <sub>4</sub> ·3H <sub>2</sub> O                 | 2.50             |                                                              |                  |

\*add autoclaved MilliQ water (20min at 121 °C) to reach 1L

| Step3: Stock solution Z8III                                   |                                               | Solution B                                                      |                                               |
|---------------------------------------------------------------|-----------------------------------------------|-----------------------------------------------------------------|-----------------------------------------------|
| Solution A                                                    | Mass (g) to dissolve in 100 ml of HCl (0.1 M) | Solution B                                                      | Mass (g) to dissolve in 100 ml of HCl (0.1 M) |
| <u>Iron solution:</u><br>FeCl <sub>3</sub> ·6H <sub>2</sub> O | 2.80                                          | <u>EDTA solution:</u><br>EDTANa <sub>2</sub> ·2H <sub>2</sub> O | 3.70                                          |

For 1L of stock solution Z8III mix 10 mL of solution A (iron solution), 10 mL of solution B (EDTA solution) and 980 mL of MilliQ water (pre-autoclaved at 121 °C for 20min)

| Step4: Trace solution |                                                                                    |                     |
|-----------------------|------------------------------------------------------------------------------------|---------------------|
| N°                    | Stock solution for trace solution                                                  | Mass (g) for 100 ml |
| 1                     | Na <sub>2</sub> WO <sub>4</sub> ·2H <sub>2</sub> O                                 | 0.33                |
| 2                     | (NH <sub>4</sub> ) <sub>6</sub> MO <sub>7</sub> O <sub>24</sub> ·4H <sub>2</sub> O | 0.88                |
| 3                     | KBr                                                                                | 1.20                |
| 4                     | KI                                                                                 | 0.83                |
| 5                     | ZnSO <sub>4</sub> ·7H <sub>2</sub> O                                               | 2.87                |
| 6                     | Cd(NO <sub>3</sub> ) <sub>2</sub> ·4H <sub>2</sub> O                               | 1.55                |
| 7                     | CO(NO <sub>3</sub> ) <sub>2</sub> ·6H <sub>2</sub> O                               | 1.46                |
| 8                     | CuSO <sub>4</sub> ·5H <sub>2</sub> O                                               | 1.25                |
| 9                     | (NH <sub>4</sub> )Ni(SO <sub>4</sub> ) <sub>2</sub> ·6H <sub>2</sub> O             | 1.98                |
| 10                    | Cr(NO <sub>3</sub> ) <sub>3</sub> ·9H <sub>2</sub> O                               | 0.41                |
| 11                    | KAl(SO <sub>4</sub> ) <sub>12</sub> H <sub>2</sub> O                               | 4.74                |
| 12                    | VO <sub>2</sub> SO <sub>4</sub>                                                    | 0.080               |
| 13                    | H <sub>3</sub> BO <sub>3</sub>                                                     | 3.1                 |
|                       | MnSO <sub>4</sub> ·H <sub>2</sub> O                                                | 1.6                 |

For 1L of Trace solution, mix stock solutions as follow:

| N° stock solution | Volume (ml) for 1L* |
|-------------------|---------------------|
| 1                 | 1                   |
| 2                 | 1                   |
| 3                 | 1                   |
| 4                 | 1                   |
| 5                 | 1                   |
| 6                 | 1                   |
| 7                 | 1                   |
| 8                 | 1                   |
| 9                 | 1                   |
| 10                | 1                   |
| 11                | 1                   |
| 12                | 1                   |
| 13                | 10                  |

\*add autoclaved MilliQ water (20min at 121 °C) to reach 1L

| Step5: Final Z8 solution |              |               |                |                |
|--------------------------|--------------|---------------|----------------|----------------|
| N° stock solution        | Z8I solution | Z8II solution | Z8III solution | Trace solution |
| Volume (ml) for 1L*      | 10           | 10            | 10             | 1              |

\*add autoclaved MilliQ water (20min at 121 °C) to reach 1L

optimal pH~7.5-7.6, can be adjusted before sterilization (autoclaved at 121 °C for 20 min)

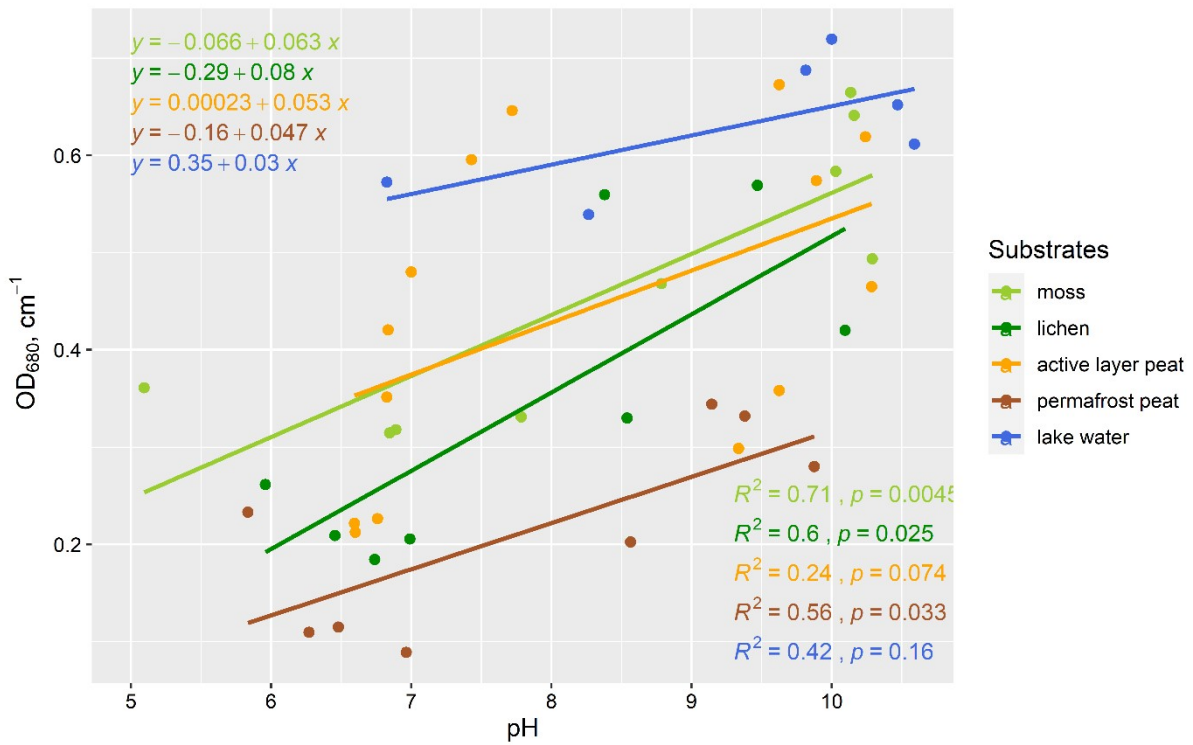

14

15 **Fig. S 2:** Correlation between pH and optical density at 680nm (biomass' proxy) for each  
 16 substrate.

17

18

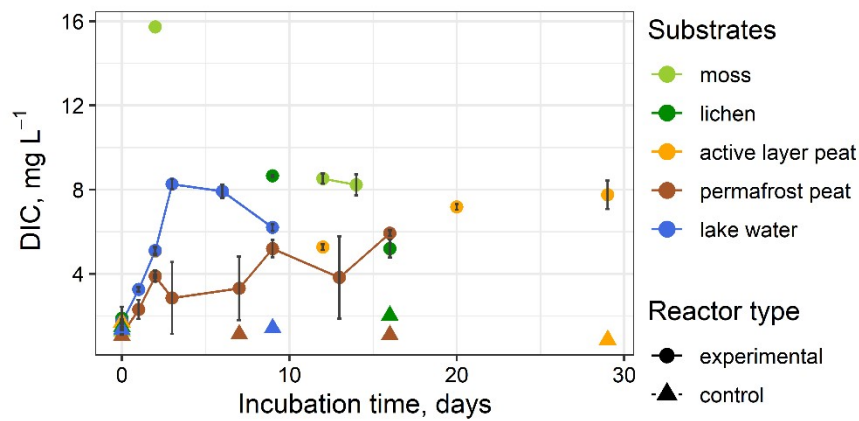

19

20 **Fig. S 3:** Dissolved inorganic (DIC) carbon concentrations over the experiments. The absence  
 21 of data indicates a non-detectable amount of DIC (i.e. < 1mg.L-1).

22

23

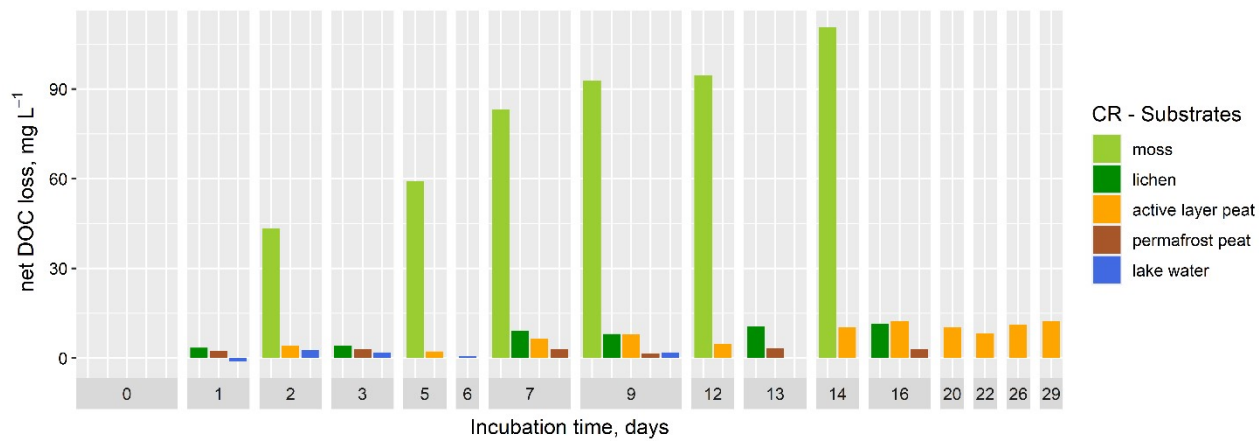

24

25 **Fig. S 4:** Net DOC loss for all CR during the incubation relative to DOC at day 0 of incubation.
